# Supplementary material
Source: Springer Nature journal article supplement (https://www.springermedizin.de/resource/supplementary/12889_2012_5231_MOESM3_ESM.pdf/9494528)

Male

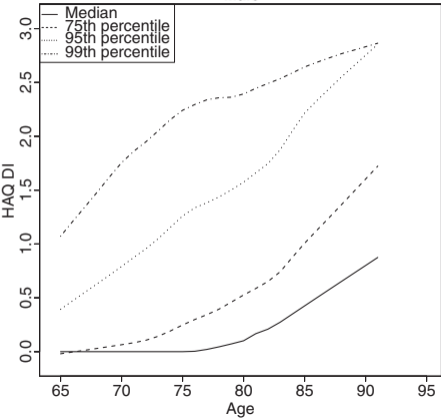

Female

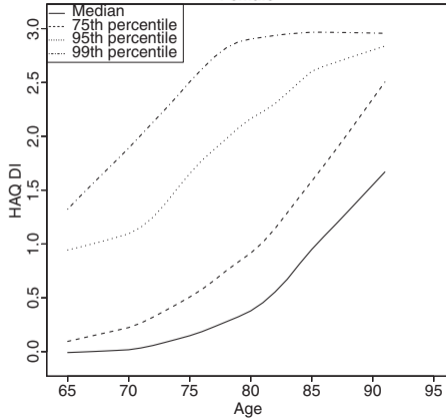

Supplement: MOESM3 [file 9494528]
